# Supplementary material for: Testosterone and estradiol affect adolescent reinforcement learning
Source: PeerJ. 2022 Feb 3;10:e12653. doi: 10.7717/peerj.12653 (PMC8818269; doi:10.7717/peerj.12653)
Supplement: Supplemental Information 2 [file peerj-10-12653-s002.xlsx]

## Sheet: Data_file2
trial	P_ID	clock	session	reaction_time
1	RLH106	slow	1	0
41	RLH011	slow	3	0
39	RLH111	fast	2	0
1	RLH112	random	2	0
28	RLH116	random	1	0
42	RLH116	random	1	0
44	RLH116	slow	1	0
50	RLH116	slow	1	0
21	RLH116	slow	2	0
22	RLH116	slow	3	0
24	RLH116	slow	3	0
49	RLH116	slow	3	0
6	RLH122	slow	1	0
2	RLH125	slow	2	0
13	RLH125	random	3	0
7	RLH126	random	3	0
15	RLH014	slow	3	0
36	RLH022	slow	1	0
19	RLH027	fast	1	0
29	RLH027	fast	2	0
34	RLH031	random	2	0
8	RLH035	random	1	0
12	RLH044	fast	1	0
47	RLH046	slow	2	0
44	RLH046	slow	3	0
16	RLH047	random	3	0
46	RLH048	fast	3	0
38	RLH055	fast	2	0
8	RLH071	random	1	0
43	RLH071	slow	1	0
44	RLH071	slow	1	0
45	RLH071	fast	1	0
46	RLH071	fast	1	0
33	RLH076	fast	3	0
20	RLH077	random	1	0
12	RLH077	slow	2	0
30	RLH080	fast	1	0
12	RLH080	slow	2	0
23	RLH080	random	2	0
24	RLH080	slow	2	0
25	RLH080	slow	2	0
26	RLH080	fast	2	0
27	RLH080	slow	2	0
39	RLH125	fast	2	0.539
39	RLH050	random	3	0.838
49	RLH103	slow	3	1.391
23	RLH070	fast	3	2.175
29	RLH125	fast	2	4.536
47	RLH103	random	3	7.409
12	RLH125	slow	2	11.205
19	RLH125	fast	1	19.89
17	RLH125	random	2	24.558
5	RLH075	fast	1	25.217
34	RLH125	random	1	30.527
21	RLH078	random	1	31.245
33	RLH054	random	1	35.067
20	RLH125	fast	2	37.892
11	RLH125	slow	2	38.556
47	RLH054	random	1	39.742
3	RLH022	fast	1	39.79
7	RLH026	random	3	41.136
43	RLH048	slow	3	41.452
24	RLH125	fast	1	43.192
23	RLH041	fast	3	43.783
43	RLH065	slow	3	46.816
2	RLH125	random	3	51.89
42	RLH070	slow	2	52.806
19	RLH125	fast	2	57.212
5	RLH125	fast	2	69.22
29	RLH125	random	1	73.22
44	RLH125	random	2	77.877
22	RLH125	random	2	78.555
30	RLH050	random	3	81.535
29	RLH054	random	1	82.395
12	RLH065	slow	2	85.469
41	RLH048	slow	3	88.091
44	RLH048	slow	3	94.117
25	RLH125	slow	2	99.223
29	RLH050	fast	3	100.852
31	RLH050	slow	3	101.543
23	RLH125	random	1	102.554
1	RLH113	random	2	107.215
45	RLH103	fast	3	110.758
10	RLH080	random	1	111.798
21	RLH070	slow	3	121.521
8	RLH125	random	3	126.554
20	RLH103	random	3	128.089
18	RLH103	fast	3	128.136
28	RLH050	fast	3	128.85
38	RLH054	fast	1	129.697
1	RLH076	random	2	131.253
39	RLH125	slow	1	132.551
20	RLH041	random	3	134.449
48	RLH103	random	3	140.716
31	RLH125	random	2	141.225
49	RLH054	fast	1	144.363
40	RLH125	random	1	152.544
43	RLH125	slow	2	153.214
32	RLH125	slow	2	153.887
44	RLH103	slow	3	154.043
3	RLH125	slow	2	155.893
42	RLH048	fast	3	156.778
32	RLH026	random	3	158.46
16	RLH054	random	2	163.729
27	RLH125	slow	2	163.901
19	RLH103	fast	3	164.081
11	RLH054	random	1	166.36
45	RLH048	fast	3	170.106
26	RLH125	slow	1	171.844
46	RLH103	fast	3	178.751
4	RLH013	random	1	181.847
28	RLH054	random	2	182.366
25	RLH125	fast	1	183.875
11	RLH125	slow	3	187.216
4	RLH107	random	1	189.443
28	RLH047	random	1	189.544
35	RLH125	random	2	191.204
43	RLH107	slow	3	193.438
28	RLH034	random	1	195.187
36	RLH125	fast	2	195.89
43	RLH055	slow	1	196.096
40	RLH125	random	2	196.553
4	RLH111	random	1	197.891
14	RLH119	slow	1	198.047
25	RLH102	fast	1	202.822
20	RLH107	random	1	203.443
21	RLH103	slow	3	204.092
21	RLH111	slow	2	204.518
5	RLH034	fast	1	205.823
15	RLH116	slow	3	208.035
43	RLH107	slow	1	208.111
3	RLH119	fast	1	210.059
7	RLH107	slow	1	210.777
3	RLH013	fast	1	210.824
19	RLH111	fast	2	211.152
49	RLH013	fast	2	211.297
14	RLH107	slow	3	212.11
22	RLH107	slow	1	212.119
47	RLH055	random	1	213.46
37	RLH107	fast	3	214.777
50	RLH013	random	2	215.057
16	RLH102	random	3	215.489
21	RLH107	random	1	216.111
13	RLH119	fast	1	217.391
5	RLH111	fast	1	217.865
8	RLH102	random	2	220.822
35	RLH107	slow	1	221.435
20	RLH111	fast	2	223.82
16	RLH107	random	1	225.442
33	RLH125	random	1	225.888
20	RLH107	fast	2	226.109
20	RLH061	random	1	226.91
8	RLH111	random	3	227.851
18	RLH060	fast	3	228.436
32	RLH111	random	3	229.851
33	RLH107	fast	3	230.102
18	RLH119	slow	1	230.723
49	RLH125	fast	1	231.22
6	RLH076	slow	1	231.263
16	RLH034	random	2	231.858
39	RLH107	fast	2	232.113
15	RLH116	fast	2	234.031
19	RLH107	fast	3	234.107
4	RLH049	random	1	234.739
12	RLH035	slow	2	234.801
25	RLH060	slow	2	236.427
24	RLH107	fast	1	236.768
34	RLH065	slow	3	236.807
9	RLH116	slow	2	238.026
9	RLH107	fast	3	238.101
47	RLH111	slow	2	238.525
40	RLH018	random	1	238.611
39	RLH048	random	3	238.779
47	RLH103	random	1	239.423
30	RLH107	fast	2	239.441
6	RLH116	fast	2	240.023
46	RLH013	fast	3	240.731
10	RLH107	fast	2	240.765
24	RLH063	fast	1	241.215
37	RLH111	slow	2	241.848
8	RLH048	random	3	242.119
10	RLH107	fast	3	242.776
39	RLH013	fast	2	244.647
44	RLH107	slow	1	244.778
3	RLH043	random	3	245.405
11	RLH048	slow	3	246.781
38	RLH013	fast	1	247.279
25	RLH116	slow	2	247.351
27	RLH116	slow	2	247.358
22	RLH103	slow	3	248.756
26	RLH107	random	3	248.774
12	RLH107	fast	1	248.777
37	RLH013	fast	3	249.135
10	RLH125	fast	2	250.551
5	RLH116	fast	2	252.008
12	RLH116	slow	2	252.04
28	RLH125	random	1	252.521
41	RLH125	fast	1	252.553
7	RLH116	random	2	252.698
2	RLH107	fast	1	252.786
50	RLH014	random	2	252.999
5	RLH013	fast	3	253.193
7	RLH111	random	3	255.194
28	RLH125	random	2	255.879
20	RLH125	random	1	256.55
47	RLH125	slow	2	256.556
37	RLH018	fast	1	256.58
5	RLH055	fast	2	256.762
28	RLH107	fast	3	256.77
48	RLH057	slow	2	257.054
37	RLH121	fast	3	257.883
5	RLH013	fast	2	258.559
7	RLH103	slow	1	258.766
9	RLH013	fast	3	258.8
10	RLH035	fast	2	258.804
36	RLH107	fast	2	259.442
11	RLH019	slow	3	259.919
42	RLH107	random	1	260.109
15	RLH107	fast	2	262.094
36	RLH013	fast	3	262.103
33	RLH010	random	1	262.643
30	RLH107	fast	1	263.431
41	RLH107	fast	1	264.11
40	RLH013	random	2	264.348
2	RLH013	fast	1	264.399
31	RLH034	slow	1	264.496
38	RLH125	fast	1	264.558
24	RLH009	fast	1	264.564
13	RLH018	random	3	264.614
31	RLH125	slow	1	265.882
10	RLH048	fast	3	266.781
48	RLH116	slow	2	268.042
9	RLH055	fast	3	268.763
18	RLH013	fast	3	269.009
49	RLH057	fast	2	269.05
23	RLH111	random	2	269.149
14	RLH013	slow	1	269.16
30	RLH102	random	3	269.49
14	RLH013	fast	2	272.152
42	RLH060	random	1	272.483
16	RLH111	random	3	272.532
13	RLH116	random	2	272.693
14	RLH055	fast	2	272.764
19	RLH051	fast	2	273.427
18	RLH072	fast	3	273.765
45	RLH018	fast	2	273.948
26	RLH103	random	3	274.081
5	RLH107	fast	1	274.091
27	RLH107	random	3	276.753
33	RLH107	random	1	276.78
47	RLH057	slow	2	277.058
5	RLH113	fast	2	277.218
42	RLH107	slow	2	277.444
37	RLH048	fast	3	279.431
30	RLH010	fast	1	279.974
6	RLH105	slow	1	281.322
21	RLH035	random	1	281.423
11	RLH111	slow	3	281.85
16	RLH055	random	2	282.107
36	RLH105	slow	1	282.661
36	RLH035	slow	1	282.772
49	RLH107	fast	2	284.112
20	RLH035	random	1	284.819
46	RLH010	fast	1	285.309
25	RLH036	fast	1	285.481
37	RLH017	fast	3	286.613
21	RLH043	slow	2	286.762
27	RLH111	random	3	287.187
49	RLH125	fast	2	288.552
3	RLH125	random	3	288.556
27	RLH043	slow	2	288.744
8	RLH116	random	2	289.369
25	RLH107	fast	1	289.445
10	RLH055	fast	3	289.446
3	RLH113	fast	1	289.884
13	RLH106	fast	1	290.787
10	RLH032	fast	3	291.985
18	RLH125	slow	2	293.222
15	RLH107	fast	1	293.448
8	RLH055	random	2	294.098
4	RLH065	slow	3	295.476
15	RLH113	fast	2	295.872
15	RLH125	fast	2	295.88
16	RLH060	random	2	296.431
38	RLH036	fast	1	296.795
6	RLH061	slow	1	296.962
22	RLH111	random	2	297.184
14	RLH013	slow	3	297.441
32	RLH035	fast	1	298.13
12	RLH048	fast	3	298.784
28	RLH115	fast	3	298.94
29	RLH021	fast	2	299.786
41	RLH076	random	2	299.955
48	RLH103	random	1	300.09
42	RLH118	fast	3	300.493
11	RLH107	random	1	300.778
11	RLH061	random	1	300.931
18	RLH072	slow	1	301.097
29	RLH104	fast	2	301.297
31	RLH035	slow	1	301.468
38	RLH032	random	3	301.98
35	RLH107	random	2	302.768
48	RLH048	random	1	303.442
27	RLH102	random	3	303.486
24	RLH119	fast	1	304.059
49	RLH036	fast	1	304.146
2	RLH060	slow	2	304.448
29	RLH037	random	1	304.451
33	RLH122	random	1	304.716
34	RLH107	random	1	304.773
32	RLH107	random	3	305.425
37	RLH063	fast	1	306.554
7	RLH111	slow	1	307.197
30	RLH119	fast	1	307.383
39	RLH044	fast	2	307.655
38	RLH051	fast	1	308.723
10	RLH052	fast	3	309.128
10	RLH052	fast	3	309.128
21	RLH036	slow	3	310.137
9	RLH035	slow	2	310.796
17	RLH048	random	3	311.442
8	RLH107	random	1	311.445
47	RLH063	random	3	311.876
10	RLH120	fast	3	311.939
46	RLH104	fast	2	311.957
42	RLH032	fast	3	312.643
3	RLH107	fast	1	313.437
14	RLH061	slow	1	313.59
9	RLH119	fast	3	314.063
34	RLH125	random	2	315.219
44	RLH010	slow	1	315.306
38	RLH107	fast	1	315.459
30	RLH111	fast	2	315.85
39	RLH034	fast	2	316.518
20	RLH010	random	3	316.647
45	RLH051	fast	2	317.421
41	RLH065	fast	1	317.45
6	RLH055	fast	2	317.459
45	RLH014	fast	2	317.648
28	RLH019	fast	3	317.915
4	RLH010	random	2	317.97
41	RLH077	slow	3	317.971
41	RLH022	fast	1	318.454
12	RLH051	fast	1	318.764
29	RLH010	fast	2	319.317
31	RLH111	random	2	319.859
36	RLH029	fast	2	319.956
49	RLH115	fast	1	320.939
29	RLH010	fast	3	321.979
31	RLH077	slow	3	322.637
26	RLH116	fast	2	322.7
30	RLH046	fast	2	323.152
50	RLH125	slow	1	323.2
20	RLH074	fast	2	323.212
50	RLH076	random	2	323.292
18	RLH124	fast	3	323.439
50	RLH044	slow	1	323.613
48	RLH063	random	3	323.87
37	RLH113	fast	3	323.885
5	RLH017	fast	2	323.929
27	RLH050	random	3	324.211
3	RLH061	fast	1	324.257
13	RLH061	fast	1	324.932
5	RLH124	fast	1	326.133
32	RLH057	random	3	326.336
38	RLH072	fast	1	326.409
25	RLH037	fast	1	326.437
11	RLH052	slow	2	327.134
11	RLH052	slow	2	327.134
48	RLH075	random	1	327.207
42	RLH111	slow	2	327.85
48	RLH051	random	1	328.086
13	RLH107	random	3	328.104
50	RLH046	slow	1	328.523
38	RLH013	fast	2	329.58
20	RLH037	fast	2	329.781
46	RLH113	fast	1	329.879
20	RLH036	random	3	330.106
14	RLH107	fast	2	330.108
6	RLH124	slow	1	330.13
10	RLH104	fast	2	330.633
2	RLH010	slow	2	330.642
46	RLH117	fast	1	330.833
10	RLH014	fast	3	330.995
16	RLH026	random	1	331.137
3	RLH116	slow	2	331.365
39	RLH116	fast	2	332.702
9	RLH107	slow	2	332.773
32	RLH106	slow	2	332.778
12	RLH052	fast	3	333.128
12	RLH052	fast	3	333.128
10	RLH013	fast	3	333.207
7	RLH011	random	2	333.301
3	RLH124	fast	1	333.474
20	RLH049	random	1	334.779
21	RLH107	slow	2	334.78
32	RLH035	random	3	334.798
43	RLH065	slow	1	334.804
11	RLH014	slow	3	335.011
31	RLH052	random	2	335.133
31	RLH052	random	2	335.133
17	RLH113	slow	1	335.214
46	RLH107	fast	3	335.421
25	RLH043	slow	2	335.435
21	RLH061	random	1	335.596
6	RLH010	fast	2	335.975
33	RLH024	random	1	336.653
15	RLH073	fast	1	337.212
5	RLH074	fast	1	337.213
36	RLH010	fast	2	338.646
10	RLH033	fast	3	338.664
46	RLH044	fast	2	338.986
35	RLH111	slow	3	339.183
40	RLH102	random	2	340.175
43	RLH111	slow	2	340.521
33	RLH055	fast	3	340.762
30	RLH037	fast	1	341.11
29	RLH075	fast	2	341.181
38	RLH018	fast	1	341.288
37	RLH077	fast	3	341.293
15	RLH055	fast	2	341.424
33	RLH102	slow	2	341.477
16	RLH052	random	3	341.79
16	RLH052	random	3	341.79
46	RLH061	fast	2	342.253
5	RLH112	fast	2	342.595
34	RLH077	slow	3	343.96
19	RLH010	fast	3	343.98
42	RLH025	random	1	344.152
33	RLH111	slow	2	344.517
15	RLH063	fast	2	344.548
40	RLH033	fast	3	344.635
46	RLH052	fast	2	345.125
46	RLH052	fast	2	345.125
14	RLH019	fast	2	345.249
29	RLH077	fast	3	345.293
11	RLH065	slow	2	345.475
45	RLH061	fast	2	346.264
46	RLH111	fast	2	346.517
16	RLH074	random	1	346.539
32	RLH010	fast	1	346.625
25	RLH029	fast	1	347.279
6	RLH033	fast	2	347.313
3	RLH126	fast	1	347.822
20	RLH074	random	1	348.539
7	RLH057	random	3	349.038
28	RLH010	fast	3	349.304
49	RLH041	slow	3	349.782
20	RLH104	fast	2	350.63
2	RLH107	slow	2	350.774
23	RLH115	random	2	350.948
12	RLH077	fast	3	351.296
39	RLH107	slow	1	351.438
3	RLH102	slow	2	351.523
6	RLH061	slow	3	351.595
39	RLH110	fast	2	353.034
18	RLH029	fast	3	353.287
29	RLH019	fast	3	354.632
28	RLH111	random	2	355.183
21	RLH041	slow	2	355.784
19	RLH052	fast	3	355.799
19	RLH052	fast	3	355.799
46	RLH113	fast	3	355.88
15	RLH077	fast	2	356.619
39	RLH017	fast	2	356.624
37	RLH108	fast	3	356.775
17	RLH077	random	3	357.249
24	RLH055	fast	1	357.42
30	RLH070	fast	1	358.861
30	RLH124	random	3	359.476
29	RLH111	fast	2	359.858
17	RLH035	slow	1	360.125
10	RLH126	fast	2	361.158
14	RLH046	slow	1	361.179
46	RLH055	fast	1	361.429
5	RLH019	fast	2	361.887
46	RLH032	fast	3	361.979
16	RLH055	random	1	362.094
18	RLH010	fast	3	363.303
25	RLH075	fast	1	364.544
1	RLH102	fast	3	364.826
17	RLH072	random	3	365.103
46	RLH021	fast	1	365.122
45	RLH115	fast	2	365.583
30	RLH026	random	3	365.787
46	RLH019	fast	2	365.916
48	RLH077	random	3	365.949
49	RLH102	fast	2	366.15
38	RLH041	random	3	366.438
46	RLH021	fast	3	366.45
18	RLH076	slow	2	366.624
42	RLH051	random	1	366.756
10	RLH051	fast	3	366.765
5	RLH036	fast	2	367.469
46	RLH070	fast	2	367.52
12	RLH125	fast	3	367.886
34	RLH070	random	1	368.182
10	RLH015	fast	2	368.23
46	RLH041	fast	3	368.445
36	RLH019	fast	3	369.247
10	RLH070	fast	3	369.522
25	RLH055	fast	1	370.105
48	RLH060	random	1	370.468
10	RLH052	fast	2	370.469
10	RLH052	fast	2	370.469
3	RLH065	random	3	370.808
34	RLH055	random	1	371.419
29	RLH049	fast	3	371.48
37	RLH117	fast	3	371.491
33	RLH019	fast	3	371.914
50	RLH046	random	2	372.521
6	RLH072	fast	2	373.748
45	RLH111	fast	2	373.853
29	RLH032	fast	3	373.978
49	RLH055	fast	1	374.095
10	RLH063	fast	3	374.553
47	RLH063	random	1	374.556
10	RLH055	fast	2	374.759
30	RLH011	fast	2	375.314
28	RLH113	random	2	375.872
41	RLH125	random	2	376.543
4	RLH124	slow	3	376.807
38	RLH010	fast	1	377.978
15	RLH033	fast	2	377.982
47	RLH055	random	3	378.761
18	RLH115	fast	3	378.931
46	RLH044	fast	3	378.958
39	RLH059	fast	2	379.727
48	RLH102	random	3	380.154
30	RLH015	fast	1	380.24
11	RLH105	slow	2	380.641
8	RLH064	random	3	380.899
45	RLH029	fast	1	381.288
39	RLH010	fast	2	381.304
43	RLH103	slow	3	381.432
6	RLH015	fast	2	381.565
6	RLH019	fast	2	381.908
19	RLH036	fast	3	382.13
33	RLH035	random	1	382.132
40	RLH057	random	2	382.374
9	RLH125	slow	2	382.543
2	RLH065	random	3	382.814
40	RLH111	random	2	383.195
38	RLH010	random	3	383.304
29	RLH013	fast	3	383.372
5	RLH102	fast	1	383.477
11	RLH073	random	1	383.877
46	RLH075	fast	1	383.878
48	RLH017	random	1	384.609
32	RLH010	slow	2	384.641
40	RLH116	random	2	384.695
44	RLH111	random	2	385.182
8	RLH017	random	2	385.927
46	RLH117	fast	3	386.161
35	RLH010	slow	1	386.644
43	RLH051	slow	1	386.753
46	RLH044	fast	1	386.986
48	RLH059	random	1	387.766
37	RLH125	fast	1	387.804
17	RLH034	random	2	387.844
10	RLH046	fast	3	387.85
10	RLH124	random	1	388.139
45	RLH018	fast	1	388.599
22	RLH051	slow	3	388.747
50	RLH041	slow	1	390.454
45	RLH034	fast	2	390.551
19	RLH010	fast	2	390.624
16	RLH116	random	2	390.69
10	RLH044	fast	3	390.726
14	RLH102	slow	3	390.82
38	RLH041	fast	1	391.123
50	RLH010	slow	1	391.339
46	RLH019	fast	3	391.801
10	RLH075	fast	3	391.871
39	RLH075	fast	2	392.514
19	RLH113	fast	2	392.558
8	RLH107	random	2	392.77
45	RLH107	fast	1	393.441
24	RLH076	slow	2	393.938
49	RLH077	slow	3	393.961
20	RLH077	random	3	394.011
21	RLH041	slow	3	395.106
45	RLH118	fast	1	395.158
6	RLH034	fast	2	395.187
12	RLH051	slow	2	395.423
39	RLH115	fast	2	395.573
29	RLH113	fast	2	395.886
16	RLH024	random	1	395.984
6	RLH070	fast	2	397.515
2	RLH071	slow	2	397.798
26	RLH107	slow	1	398.096
17	RLH061	slow	1	398.226
37	RLH110	fast	1	398.366
10	RLH073	fast	2	398.544
41	RLH110	fast	1	400.356
29	RLH075	fast	3	400.541
39	RLH019	fast	2	400.585
20	RLH110	fast	2	401.042
6	RLH041	fast	2	401.773
13	RLH124	fast	1	402.132
13	RLH015	random	3	402.243
2	RLH051	random	3	402.75
16	RLH125	random	2	403.888
30	RLH010	fast	2	403.978
9	RLH103	slow	1	404.093
13	RLH103	random	2	404.095
13	RLH055	fast	1	404.745
25	RLH111	slow	2	405.851
30	RLH112	fast	1	405.979
46	RLH055	fast	3	406.094
17	RLH055	random	2	406.096
17	RLH059	random	3	406.424
16	RLH121	random	1	406.534
30	RLH077	fast	2	406.651
22	RLH041	slow	1	407.785
23	RLH055	random	2	408.086
2	RLH063	slow	2	408.539
41	RLH102	random	2	408.817
13	RLH009	fast	1	409.252
35	RLH065	slow	3	409.462
33	RLH034	slow	2	409.832
33	RLH111	fast	3	409.86
5	RLH046	fast	1	410.521
22	RLH070	slow	1	410.851
15	RLH041	fast	2	411.086
30	RLH063	fast	2	411.208
30	RLH044	fast	2	411.646
31	RLH021	random	2	411.783
41	RLH034	random	2	413.188
6	RLH112	slow	1	413.31
11	RLH043	random	1	413.422
19	RLH077	fast	3	413.928
9	RLH048	fast	3	414.779
10	RLH121	fast	3	415.208
3	RLH077	random	3	415.929
15	RLH052	fast	2	416.459
15	RLH052	fast	2	416.459
12	RLH017	fast	3	416.578
12	RLH061	fast	1	416.936
6	RLH044	fast	2	416.983
50	RLH057	random	2	417.72
24	RLH034	slow	2	417.851
33	RLH040	random	1	417.981
18	RLH045	fast	3	419.477
20	RLH015	fast	2	419.557
15	RLH059	fast	2	419.743
47	RLH120	slow	2	419.92
47	RLH017	random	1	419.938
16	RLH071	random	1	420.423
11	RLH017	random	1	420.611
45	RLH055	fast	1	420.762
36	RLH046	fast	2	421.188
38	RLH029	fast	1	421.284
47	RLH077	random	1	421.287
10	RLH077	fast	3	421.962
38	RLH111	fast	2	422.519
18	RLH121	slow	1	423.183
14	RLH073	fast	2	423.211
45	RLH010	fast	1	423.249
46	RLH120	fast	2	423.268
4	RLH116	random	2	423.362
26	RLH075	fast	2	423.877
37	RLH018	fast	3	423.935
29	RLH111	fast	3	424.518
18	RLH044	fast	3	424.991
40	RLH040	random	1	425.264
37	RLH055	fast	1	425.424
27	RLH107	slow	2	425.443
39	RLH102	slow	1	425.502
46	RLH063	fast	1	425.882
6	RLH041	slow	1	426.401
33	RLH063	fast	3	427.212
45	RLH019	fast	3	427.243
33	RLH077	fast	3	427.294
41	RLH055	fast	1	427.427
5	RLH035	fast	1	427.467
36	RLH124	fast	2	427.469
49	RLH046	fast	1	427.853
37	RLH034	slow	2	427.858
1	RLH113	fast	3	427.862
15	RLH073	fast	2	427.875
4	RLH125	random	1	427.917
46	RLH108	fast	3	428.105
30	RLH118	fast	2	428.487
28	RLH077	fast	3	428.595
40	RLH075	fast	3	429.207
17	RLH102	random	2	429.488
38	RLH020	fast	2	429.783
15	RLH017	fast	1	429.935
30	RLH077	random	3	429.961
6	RLH055	slow	1	430.761
29	RLH115	fast	3	430.938
6	RLH021	fast	2	431.118
1	RLH074	random	2	431.21
38	RLH039	fast	1	431.235
17	RLH021	random	3	431.773
35	RLH077	slow	1	431.954
31	RLH076	random	2	431.958
12	RLH016	fast	3	432.016
21	RLH055	slow	2	432.093
48	RLH107	slow	2	432.1
19	RLH124	fast	3	432.139
24	RLH124	fast	1	432.141
39	RLH031	fast	2	432.244
6	RLH022	fast	2	432.46
11	RLH034	random	1	432.49
33	RLH076	slow	2	432.595
7	RLH051	slow	1	433.418
42	RLH103	fast	3	433.441
6	RLH125	fast	2	433.883
40	RLH077	fast	3	433.929
26	RLH036	slow	1	434.115
46	RLH014	fast	2	434.326
38	RLH110	fast	1	434.375
14	RLH021	fast	2	434.448
39	RLH032	random	3	434.641
23	RLH024	random	1	434.648
40	RLH048	fast	3	435.421
15	RLH011	fast	1	435.975
20	RLH022	fast	2	436.462
46	RLH055	fast	2	436.754
47	RLH035	slow	2	436.794
5	RLH124	fast	3	436.829
27	RLH023	random	3	436.903
24	RLH030	fast	1	437.099
23	RLH034	random	2	437.184
36	RLH111	fast	2	437.189
11	RLH111	random	1	437.191
5	RLH063	fast	2	437.849
33	RLH074	random	1	437.869
5	RLH121	fast	2	437.885
29	RLH024	random	1	437.986
11	RLH124	slow	3	438.149
19	RLH055	fast	1	438.759
27	RLH044	slow	2	438.97
37	RLH118	fast	1	439.153
36	RLH125	slow	1	439.166
6	RLH107	fast	2	439.445
19	RLH021	fast	3	439.782
27	RLH077	random	3	439.969
44	RLH061	slow	1	440.237
38	RLH037	fast	1	440.444
6	RLH075	fast	2	440.512
5	RLH017	fast	3	440.608
39	RLH124	fast	2	440.798
9	RLH015	fast	3	441.552
6	RLH027	slow	1	441.692
45	RLH125	fast	2	441.875
46	RLH073	fast	3	441.878
10	RLH043	fast	3	442.075
14	RLH125	fast	2	443.211
37	RLH010	fast	1	443.298
28	RLH116	random	2	443.359
16	RLH108	random	2	443.445
36	RLH043	slow	1	444.078
46	RLH037	fast	1	444.435
37	RLH026	fast	3	444.468
31	RLH010	slow	1	444.643
6	RLH106	fast	2	444.784
7	RLH124	random	2	445.474
14	RLH041	slow	1	445.819
9	RLH081	fast	3	445.834
20	RLH075	fast	2	445.846
7	RLH125	random	2	445.865
6	RLH074	slow	1	445.87
26	RLH039	slow	1	445.895
36	RLH076	fast	2	445.967
34	RLH034	random	2	446.506
20	RLH063	fast	2	446.536
10	RLH104	fast	3	446.627
11	RLH035	slow	2	446.809
34	RLH117	slow	3	446.824
12	RLH063	fast	3	447.215
3	RLH010	slow	2	447.309
36	RLH119	fast	2	447.379
49	RLH111	slow	3	447.836
49	RLH064	fast	2	448.222
17	RLH081	random	3	448.554
42	RLH024	random	1	448.654
4	RLH116	slow	3	448.687
19	RLH055	fast	3	448.762
6	RLH126	slow	1	449.141
10	RLH030	fast	3	449.771
3	RLH111	fast	1	449.842
20	RLH077	fast	2	449.961
15	RLH119	fast	1	450.044
10	RLH059	fast	3	450.42
26	RLH118	fast	2	450.483
9	RLH119	slow	2	450.726
26	RLH059	slow	1	451.088
18	RLH048	slow	1	451.444
15	RLH037	fast	2	451.769
41	RLH046	random	2	451.812
10	RLH018	fast	3	451.937
41	RLH024	fast	1	451.988
32	RLH119	fast	1	452.058
26	RLH043	fast	2	452.093
21	RLH044	slow	2	452.971
48	RLH041	random	1	453.111
23	RLH076	random	2	453.261
42	RLH017	fast	3	453.275
6	RLH077	fast	2	453.302
50	RLH040	random	2	453.321
33	RLH124	random	1	453.47
46	RLH075	fast	2	453.877
50	RLH077	random	3	453.957
46	RLH046	fast	1	454.514
40	RLH115	fast	3	454.938
40	RLH046	random	2	455.178
41	RLH055	random	2	455.416
10	RLH074	random	1	455.877
2	RLH103	random	3	456.088
19	RLH035	fast	1	456.132
2	RLH124	random	3	456.134
28	RLH126	random	2	456.454
26	RLH077	slow	1	456.616
14	RLH107	slow	1	456.767
9	RLH077	fast	3	457.295
49	RLH041	fast	1	457.786
41	RLH120	random	2	457.923
17	RLH076	random	2	457.951
22	RLH036	slow	3	458.135
17	RLH044	random	2	458.305
18	RLH063	fast	3	458.55
25	RLH017	fast	1	458.621
37	RLH076	slow	2	458.629
46	RLH103	fast	1	458.773
16	RLH070	random	2	458.802
36	RLH059	fast	3	459.085
44	RLH111	slow	3	459.18
46	RLH063	fast	3	459.203
19	RLH015	fast	3	459.57
15	RLH119	fast	2	460.038
6	RLH036	fast	2	460.131
34	RLH041	random	1	460.453
25	RLH119	fast	1	460.714
3	RLH034	fast	1	461.153
38	RLH043	random	3	461.404
46	RLH121	fast	2	462.537
20	RLH119	random	1	462.708
8	RLH103	random	1	462.762
17	RLH061	random	3	462.927
31	RLH041	slow	1	463.061
15	RLH021	fast	2	463.12
9	RLH034	fast	3	463.145
40	RLH034	fast	3	463.187
10	RLH019	fast	3	463.26
50	RLH055	random	2	463.428
3	RLH108	fast	1	463.447
5	RLH015	fast	3	463.569
8	RLH046	random	1	463.841
9	RLH046	fast	3	463.842
36	RLH111	fast	3	463.852
19	RLH017	fast	1	463.943
25	RLH020	fast	1	464.448
34	RLH022	random	1	464.459
41	RLH022	random	2	464.459
38	RLH034	fast	2	464.541
37	RLH029	fast	1	464.616
19	RLH079	fast	3	464.676
15	RLH035	fast	2	464.8
27	RLH026	random	3	465.129
3	RLH103	slow	2	465.431
45	RLH110	fast	1	465.7
22	RLH059	slow	1	465.729
25	RLH118	fast	1	465.824
35	RLH034	random	2	466.514
19	RLH119	fast	1	466.724
46	RLH073	fast	1	467.201
33	RLH124	fast	3	467.471
40	RLH022	random	2	467.776
15	RLH052	fast	1	467.783
15	RLH052	fast	1	467.783
25	RLH077	fast	1	467.914
5	RLH051	fast	2	468.083
13	RLH055	random	2	468.093
32	RLH073	fast	1	468.54
19	RLH073	fast	1	468.543
20	RLH019	fast	2	468.556
37	RLH076	fast	3	468.624
27	RLH010	random	3	468.632
7	RLH010	random	2	468.642
49	RLH107	slow	3	468.764
26	RLH107	fast	2	468.768
14	RLH116	fast	2	469.36
19	RLH111	fast	3	469.849
30	RLH040	fast	2	469.977
13	RLH035	fast	1	470.133
15	RLH020	fast	1	470.446
26	RLH035	slow	1	470.798
25	RLH044	slow	3	470.977
46	RLH074	fast	1	471.211
26	RLH125	fast	2	471.229
30	RLH031	fast	2	471.608
17	RLH075	random	2	471.88
29	RLH076	fast	3	471.94
20	RLH044	fast	2	472.311
35	RLH111	random	2	472.523
6	RLH104	fast	2	472.619
41	RLH107	random	2	472.768
5	RLH070	fast	2	472.819
15	RLH044	fast	2	472.952
40	RLH057	fast	3	473.051
38	RLH021	fast	1	473.107
42	RLH019	random	1	473.247
20	RLH060	random	1	474.423
30	RLH041	fast	1	474.444
2	RLH052	fast	1	474.461
2	RLH052	fast	1	474.461
46	RLH119	fast	2	474.715
38	RLH022	fast	2	475.123
38	RLH079	random	3	475.344
6	RLH108	slow	1	475.442
6	RLH102	slow	1	475.476
15	RLH070	fast	1	475.497
19	RLH022	fast	3	475.807
9	RLH046	slow	1	475.843
30	RLH034	fast	2	475.845
19	RLH121	fast	3	475.88
2	RLH074	fast	1	476.545
46	RLH077	fast	2	476.625
22	RLH032	random	2	476.642
20	RLH105	random	1	476.657
37	RLH049	fast	3	476.781
28	RLH026	fast	3	477.129
2	RLH111	fast	1	477.176
7	RLH107	random	3	477.432
40	RLH110	random	2	477.696
9	RLH118	slow	1	477.825
25	RLH043	fast	1	478.742
20	RLH124	fast	2	478.805
9	RLH041	slow	2	479.103
46	RLH016	fast	2	479.345
41	RLH010	slow	3	479.965
37	RLH107	slow	2	480.103
37	RLH125	slow	2	480.551
45	RLH077	fast	3	480.617
45	RLH055	fast	2	480.75
25	RLH070	fast	1	480.847
13	RLH028	fast	1	480.973
45	RLH121	fast	1	481.199
49	RLH017	fast	2	481.275
32	RLH074	fast	1	481.875
23	RLH074	random	1	481.877
15	RLH117	fast	2	482.164
41	RLH041	slow	3	482.434
21	RLH021	slow	2	482.442
18	RLH017	fast	3	482.628
29	RLH015	fast	2	482.877
1	RLH021	fast	3	483.113
10	RLH038	fast	3	483.258
50	RLH111	random	3	483.845
30	RLH076	fast	2	483.96
2	RLH064	slow	2	484.238
14	RLH073	slow	1	484.535
27	RLH018	slow	1	484.609
8	RLH010	random	2	484.63
45	RLH013	fast	3	485.008
5	RLH027	fast	1	485.021
7	RLH111	random	2	485.178
14	RLH034	slow	3	485.196
50	RLH125	random	2	485.221
7	RLH017	random	2	485.276
38	RLH077	fast	1	485.282
15	RLH020	fast	2	485.777
46	RLH032	fast	2	485.969
38	RLH055	fast	1	486.092
15	RLH015	fast	2	486.233
5	RLH052	fast	3	486.467
5	RLH052	fast	3	486.467
6	RLH111	slow	1	486.515
33	RLH125	slow	2	486.538
19	RLH017	fast	3	486.577
38	RLH024	fast	1	486.657
17	RLH016	random	2	486.682
15	RLH049	fast	2	486.777
29	RLH041	fast	3	487.108
45	RLH020	fast	1	487.115
13	RLH052	random	2	487.13
13	RLH052	random	2	487.13
38	RLH063	fast	2	487.218
4	RLH052	random	2	487.803
4	RLH052	random	2	487.803
45	RLH015	fast	2	488.231
30	RLH111	fast	1	488.507
33	RLH063	random	1	488.547
31	RLH010	random	2	488.632
42	RLH108	random	1	488.761
20	RLH034	random	1	489.189
6	RLH113	fast	2	489.21
16	RLH112	random	1	489.303
41	RLH106	slow	3	489.449
13	RLH050	fast	1	489.54
10	RLH057	fast	3	489.716
30	RLH126	fast	2	489.808
16	RLH017	random	1	489.935
1	RLH055	fast	3	490.093
6	RLH056	slow	1	490.353
6	RLH057	fast	2	490.373
30	RLH057	fast	2	490.377
5	RLH020	fast	2	490.448
10	RLH020	fast	3	490.45
8	RLH041	random	2	490.456
41	RLH077	fast	1	490.643
24	RLH034	fast	1	491.195
49	RLH045	fast	1	491.458
12	RLH014	fast	3	491.658
11	RLH022	random	1	491.787
5	RLH075	fast	2	491.875
47	RLH016	slow	2	491.991
5	RLH070	fast	3	492.214
16	RLH037	random	1	492.466
46	RLH077	fast	3	492.619
3	RLH103	random	3	492.765
17	RLH111	random	3	493.181
46	RLH121	fast	1	493.197
19	RLH073	fast	3	493.209
46	RLH123	fast	1	493.484
5	RLH113	fast	3	493.921
2	RLH119	fast	1	494.021
7	RLH124	slow	1	494.147
18	RLH111	slow	2	494.508
45	RLH063	fast	2	494.542
48	RLH011	random	1	494.63
17	RLH051	slow	1	494.749
29	RLH052	fast	3	495.131
29	RLH052	fast	3	495.131
33	RLH022	fast	3	495.137
1	RLH063	fast	3	495.212
21	RLH039	random	1	495.225
44	RLH035	slow	1	495.464
38	RLH064	fast	2	495.557
16	RLH041	random	2	495.767
13	RLH073	fast	1	495.871
30	RLH055	fast	2	496.086
31	RLH120	random	2	496.589
50	RLH016	random	2	496.648
5	RLH119	fast	3	496.76
3	RLH035	random	3	496.798
9	RLH064	fast	3	496.887
4	RLH061	random	1	496.92
24	RLH121	fast	1	497.197
20	RLH119	fast	2	497.38
38	RLH077	random	3	497.949
42	RLH032	random	1	497.974
37	RLH032	fast	3	497.983
39	RLH057	fast	2	498.38
10	RLH022	fast	2	498.461
22	RLH077	slow	3	498.603
28	RLH034	random	2	499.176
9	RLH077	slow	1	499.28
9	RLH017	fast	3	499.293
38	RLH064	fast	1	499.562
16	RLH118	random	1	499.803
19	RLH121	fast	1	499.873
37	RLH063	fast	3	499.88
39	RLH076	fast	2	499.959
29	RLH055	fast	2	500.093
42	RLH055	slow	2	500.093
20	RLH102	random	1	500.147
33	RLH022	random	1	500.453
32	RLH111	slow	2	500.472
37	RLH040	fast	3	500.641
10	RLH117	fast	2	500.838
22	RLH077	slow	1	501.95
33	RLH079	fast	3	502.026
7	RLH108	random	3	502.1
2	RLH057	random	3	502.376
27	RLH111	slow	2	502.513
30	RLH010	random	3	502.629
46	RLH105	fast	3	502.653
17	RLH048	slow	1	502.774
19	RLH035	fast	3	502.791
40	RLH070	fast	3	502.845
18	RLH022	fast	3	503.099
40	RLH032	fast	3	503.302
31	RLH010	slow	3	503.307
12	RLH112	fast	1	503.34
19	RLH016	fast	2	503.345
39	RLH070	fast	2	503.509
23	RLH027	random	2	503.7
28	RLH016	random	2	503.985
10	RLH036	fast	3	504.135
38	RLH015	fast	1	504.233
29	RLH056	fast	3	504.356
19	RLH020	fast	2	504.447
22	RLH034	random	2	504.518
31	RLH034	random	2	504.518
2	RLH033	slow	2	504.637
37	RLH014	fast	3	504.964
46	RLH039	fast	1	505.242
41	RLH075	fast	1	505.867
9	RLH063	fast	3	505.88
31	RLH102	slow	3	506.132
17	RLH057	random	3	506.384
35	RLH125	slow	1	506.528
17	RLH116	random	2	506.695
33	RLH119	fast	3	506.71
39	RLH051	fast	2	506.741
27	RLH051	random	3	506.747
42	RLH108	fast	3	506.766
29	RLH107	fast	2	506.769
1	RLH107	fast	3	506.775
1	RLH044	random	2	506.976
33	RLH038	random	1	507.24
33	RLH112	random	1	507.318
13	RLH112	fast	1	508.008
20	RLH016	fast	2	508.01
39	RLH119	fast	2	508.038
4	RLH055	random	2	508.095
46	RLH015	fast	1	508.225
5	RLH126	fast	1	508.475
2	RLH012	slow	2	509.009
30	RLH073	fast	2	509.87
39	RLH077	fast	2	509.951
26	RLH055	fast	2	510.093
36	RLH034	fast	2	510.519
8	RLH077	random	1	510.617
44	RLH070	random	2	510.88
5	RLH064	fast	3	510.903
26	RLH056	fast	2	511.021
26	RLH113	fast	2	511.216
46	RLH017	fast	1	511.276
2	RLH076	random	3	511.302
46	RLH079	fast	1	511.343
40	RLH108	random	1	511.444
15	RLH056	fast	2	511.692
50	RLH037	slow	1	511.778
13	RLH020	random	3	511.782
14	RLH125	slow	3	511.852
11	RLH121	slow	2	511.865
49	RLH111	fast	2	511.878
21	RLH038	random	1	511.91
2	RLH040	slow	2	511.975
36	RLH119	fast	3	512.047
29	RLH045	fast	2	512.128
45	RLH065	fast	2	512.128
24	RLH027	fast	1	512.331
48	RLH111	random	1	512.515
40	RLH063	fast	3	512.53
37	RLH075	fast	3	512.542
4	RLH018	slow	3	512.604
6	RLH017	fast	2	512.612
37	RLH077	fast	1	512.619
4	RLH076	slow	3	512.624
41	RLH074	fast	1	513.199
31	RLH121	slow	3	513.205
30	RLH125	fast	2	513.215
20	RLH052	random	1	513.795
20	RLH052	random	1	513.795
38	RLH118	fast	2	513.813
21	RLH077	random	1	513.96
49	RLH107	fast	1	514.09
17	RLH046	random	3	514.501
30	RLH077	fast	1	514.616
14	RLH016	fast	2	514.677
1	RLH011	fast	3	515.308
3	RLH035	fast	1	515.418
5	RLH020	fast	1	515.783
48	RLH111	random	3	515.84
9	RLH074	slow	1	515.869
13	RLH077	random	3	515.967
20	RLH032	fast	2	515.971
37	RLH033	fast	3	515.976
16	RLH052	random	2	516.462
16	RLH052	random	2	516.462
29	RLH126	fast	3	516.473
21	RLH034	slow	2	516.509
50	RLH111	random	2	516.513
46	RLH033	fast	2	516.633
30	RLH057	random	3	517.042
9	RLH010	slow	2	517.298
29	RLH070	fast	3	517.513
42	RLH017	random	1	517.811
37	RLH019	fast	3	517.912
25	RLH034	slow	2	518.367
46	RLH022	fast	3	518.462
29	RLH063	fast	2	518.546
46	RLH009	fast	3	518.582
10	RLH032	fast	2	518.645
21	RLH060	random	1	519.117
47	RLH036	random	1	519.47
45	RLH052	fast	1	519.754
45	RLH052	fast	1	519.754
46	RLH022	fast	2	519.792
49	RLH063	fast	1	519.872
4	RLH017	random	2	519.947
10	RLH107	random	1	520.095
1	RLH103	random	2	520.097
19	RLH048	fast	3	520.115
19	RLH045	fast	3	520.138
16	RLH115	random	1	520.26
46	RLH020	fast	2	520.45
31	RLH073	slow	1	520.569
29	RLH119	fast	2	520.704
10	RLH045	fast	3	520.79
29	RLH044	fast	3	520.989
12	RLH017	fast	1	521.087
37	RLH074	fast	3	521.204
46	RLH121	fast	3	521.205
45	RLH055	fast	3	521.424
24	RLH015	fast	1	521.562
45	RLH022	fast	3	521.763
38	RLH030	fast	1	521.774
30	RLH121	fast	2	521.872
32	RLH055	fast	1	522.092
34	RLH107	random	2	522.094
20	RLH115	fast	2	522.305
4	RLH046	slow	3	522.509
6	RLH111	slow	3	522.522
2	RLH073	slow	2	522.555
34	RLH029	random	1	522.64
46	RLH059	fast	1	523.105
18	RLH048	fast	3	523.442
16	RLH124	random	3	523.472
46	RLH118	fast	2	523.826
37	RLH111	fast	3	523.841
1	RLH125	random	2	523.919
25	RLH024	fast	1	523.99
34	RLH025	random	1	524.21
13	RLH059	fast	1	524.369
39	RLH057	random	3	524.386
36	RLH126	fast	2	524.475
33	RLH104	fast	3	524.598
46	RLH040	fast	2	524.632
5	RLH032	fast	3	524.644
30	RLH117	random	3	524.829
16	RLH015	random	1	524.899
42	RLH021	fast	3	525.111
39	RLH020	slow	1	525.134
28	RLH073	fast	3	525.2
49	RLH017	fast	1	525.269
38	RLH017	fast	1	525.276
45	RLH033	fast	1	525.323
21	RLH043	random	1	525.416
29	RLH045	fast	3	525.468
4	RLH015	random	2	525.579
25	RLH028	fast	1	525.671
7	RLH052	random	2	525.793
7	RLH052	random	2	525.793
41	RLH015	fast	1	526.264
40	RLH072	random	1	526.397
16	RLH041	random	1	526.445
27	RLH052	random	3	526.464
27	RLH052	random	3	526.464
7	RLH073	slow	1	526.536
46	RLH018	fast	2	526.615
39	RLH032	fast	2	526.678
1	RLH055	random	2	526.752
28	RLH057	random	1	527.043
27	RLH034	slow	2	527.188
6	RLH046	slow	1	527.197
15	RLH075	fast	2	527.215
12	RLH044	fast	3	527.637
36	RLH063	fast	3	527.878
23	RLH035	fast	3	528.13
13	RLH118	random	2	528.486
40	RLH034	random	2	528.515
42	RLH125	random	1	528.558
5	RLH063	fast	3	529.229
47	RLH077	random	3	529.278
48	RLH042	random	1	529.599
10	RLH054	fast	3	529.702
42	RLH041	random	1	529.777
28	RLH032	fast	3	529.983
6	RLH121	fast	2	530.54
36	RLH017	fast	3	530.612
41	RLH029	fast	1	530.623
29	RLH108	fast	3	530.776
38	RLH124	fast	1	530.809
46	RLH036	fast	1	531.475
9	RLH031	fast	3	531.611
5	RLH020	fast	3	531.793
42	RLH022	random	1	531.801
10	RLH063	fast	2	531.849
23	RLH032	fast	3	531.955
2	RLH077	random	3	531.962
46	RLH019	fast	1	531.975
3	RLH116	fast	1	532.018
6	RLH106	slow	1	532.115
13	RLH017	fast	1	533.277
15	RLH032	fast	2	533.348
34	RLH024	random	1	533.351
49	RLH070	fast	2	533.516
19	RLH044	fast	3	533.641
23	RLH022	fast	3	533.796
49	RLH022	fast	2	533.798
39	RLH118	fast	2	533.812
19	RLH075	fast	3	533.848
45	RLH121	fast	3	533.863
28	RLH063	fast	3	533.88
48	RLH048	random	3	534.112
49	RLH102	fast	1	534.136
25	RLH015	fast	1	534.23
40	RLH014	fast	3	534.329
32	RLH020	fast	1	535.109
19	RLH074	fast	3	535.215
5	RLH077	fast	3	535.918
45	RLH024	fast	2	535.99
11	RLH041	slow	2	536.433
14	RLH112	slow	1	536.609
46	RLH076	fast	2	536.61
47	RLH032	random	1	536.644
29	RLH031	fast	3	536.94
8	RLH057	random	3	537.088
23	RLH019	fast	3	537.25
37	RLH033	fast	1	537.261
37	RLH015	fast	3	537.571
44	RLH028	random	2	537.639
15	RLH028	fast	1	537.642
37	RLH046	fast	3	537.836
24	RLH111	slow	2	537.861
37	RLH112	fast	3	537.976
49	RLH040	fast	1	537.976
31	RLH106	slow	1	538.111
21	RLH035	slow	2	538.137
26	RLH034	fast	2	538.523
25	RLH079	fast	1	538.687
29	RLH055	fast	3	538.752
41	RLH108	random	2	538.769
49	RLH055	fast	2	538.772
34	RLH051	random	1	539.37
30	RLH041	random	3	539.752
46	RLH052	fast	1	539.796
46	RLH052	fast	1	539.796
46	RLH020	fast	1	539.798
23	RLH120	random	2	539.926
22	RLH112	slow	1	539.967
24	RLH040	slow	3	539.986
8	RLH108	random	1	540.103
23	RLH121	random	2	540.53
46	RLH113	fast	2	540.546
12	RLH113	fast	3	540.546
38	RLH009	fast	1	540.578
40	RLH011	random	2	540.635
3	RLH124	random	3	540.755
37	RLH031	fast	3	540.94
17	RLH026	random	3	541.133
23	RLH034	fast	3	541.19
15	RLH019	fast	2	541.227
12	RLH124	fast	1	541.472
15	RLH081	fast	2	541.871
48	RLH032	random	1	541.965
19	RLH107	fast	2	542.094
44	RLH061	random	2	542.26
42	RLH120	slow	2	542.591
29	RLH033	fast	3	542.649
13	RLH124	random	3	542.83
6	RLH064	fast	2	542.92
36	RLH059	fast	2	543.081
19	RLH063	fast	3	543.213
9	RLH033	fast	3	543.311
17	RLH045	random	3	543.463
38	RLH044	fast	2	543.652
15	RLH022	fast	2	543.807
39	RLH079	random	3	544.022
42	RLH055	random	1	544.083
49	RLH103	fast	1	544.095
6	RLH035	slow	1	544.144
37	RLH021	fast	3	544.449
19	RLH118	fast	1	544.492
33	RLH120	slow	2	544.588
16	RLH012	random	2	544.607
45	RLH029	fast	2	544.616
20	RLH033	fast	2	544.65
46	RLH124	fast	2	544.805
26	RLH023	random	3	544.909
38	RLH020	fast	1	545.115
37	RLH030	fast	3	545.771
39	RLH120	fast	2	545.923
20	RLH043	random	1	546.079
18	RLH061	slow	1	546.218
15	RLH056	fast	1	546.339
3	RLH057	random	3	547.028
32	RLH121	slow	2	547.202
48	RLH073	random	3	547.21
49	RLH019	fast	2	547.249
29	RLH022	fast	2	547.795
28	RLH076	random	2	547.957
46	RLH123	fast	3	548.158
5	RLH050	fast	3	548.2
46	RLH064	fast	1	548.219
42	RLH064	random	1	548.224
7	RLH061	random	3	548.265
5	RLH056	fast	2	548.368
45	RLH041	fast	3	548.423
20	RLH113	fast	2	548.544
41	RLH113	fast	1	548.545
30	RLH076	random	3	548.625
28	RLH043	random	2	548.776
50	RLH070	random	3	548.831
46	RLH022	fast	1	549.12
19	RLH113	fast	3	549.209
40	RLH017	fast	3	549.245
46	RLH040	fast	1	549.304
30	RLH033	fast	2	549.312
46	RLH070	fast	1	549.519
20	RLH064	random	1	549.557
45	RLH125	fast	1	549.853
39	RLH077	random	3	549.957
11	RLH033	random	1	549.986
47	RLH025	random	1	550.172
28	RLH055	fast	3	550.753
48	RLH123	random	1	550.825
4	RLH060	random	1	551.106
45	RLH113	fast	3	551.202
41	RLH081	random	2	551.208
19	RLH019	fast	3	551.256
10	RLH017	fast	3	551.297
6	RLH029	slow	1	551.95
19	RLH077	fast	1	551.964
50	RLH055	random	3	552.085
49	RLH108	slow	3	552.107
11	RLH112	slow	2	552.639
39	RLH016	fast	2	552.65
49	RLH020	fast	1	553.116
19	RLH052	fast	2	553.126
19	RLH052	fast	2	553.126
6	RLH120	fast	2	553.251
19	RLH033	fast	3	553.337
38	RLH070	fast	1	553.485
37	RLH073	fast	1	553.868
7	RLH077	random	2	553.958
39	RLH072	slow	1	554.384
25	RLH071	fast	1	554.409
30	RLH020	fast	2	554.444
48	RLH125	random	1	554.514
7	RLH074	slow	1	554.545
11	RLH112	random	1	554.634
1	RLH032	fast	3	554.641
36	RLH107	fast	3	554.769
24	RLH047	fast	1	554.851
22	RLH060	slow	1	555.1
4	RLH012	random	2	555.193
27	RLH016	slow	2	555.301
40	RLH124	random	1	555.467
35	RLH118	random	2	555.803
28	RLH121	fast	3	555.862
18	RLH113	slow	1	555.868
41	RLH073	fast	1	555.87
17	RLH073	random	3	555.877
45	RLH057	fast	2	556.383
37	RLH021	fast	1	556.441
5	RLH052	fast	2	556.464
5	RLH052	fast	2	556.464
8	RLH036	random	2	557.466
14	RLH045	fast	2	557.481
37	RLH025	fast	3	557.506
16	RLH044	random	2	557.596
45	RLH027	fast	1	557.664
23	RLH056	fast	3	557.697
49	RLH071	fast	1	557.747
43	RLH034	slow	2	557.855
10	RLH040	fast	3	557.963
39	RLH040	fast	2	557.99
24	RLH035	fast	1	558.135
50	RLH124	slow	1	558.138
16	RLH124	random	1	558.161
28	RLH118	random	1	558.487
5	RLH033	fast	2	558.645
17	RLH108	random	3	558.778
30	RLH025	random	3	558.851
30	RLH050	fast	2	558.879
36	RLH044	fast	2	558.985
3	RLH073	slow	2	559.202
30	RLH032	fast	2	559.335
19	RLH055	fast	2	559.419
41	RLH070	fast	1	559.509
19	RLH015	fast	2	559.564
33	RLH020	fast	3	559.749
39	RLH022	fast	2	559.769
41	RLH120	fast	1	559.925
19	RLH009	fast	3	560.61
37	RLH106	slow	2	560.794
29	RLH117	fast	3	560.834
6	RLH070	slow	3	560.851
49	RLH015	fast	1	560.854
38	RLH044	fast	1	560.991
23	RLH038	random	1	561.21
50	RLH017	slow	1	561.277
16	RLH077	random	3	561.322
36	RLH055	fast	2	561.419
1	RLH115	fast	3	561.612
5	RLH077	fast	1	561.962
29	RLH040	fast	2	561.983
30	RLH124	fast	2	562.13
48	RLH025	random	1	562.193
14	RLH015	fast	2	562.211
49	RLH021	fast	1	562.442
33	RLH019	random	1	562.584
39	RLH112	random	3	562.632
6	RLH112	fast	2	562.634
25	RLH035	fast	1	562.768
33	RLH117	fast	3	562.827
12	RLH070	fast	3	562.849
19	RLH041	fast	1	563.126
5	RLH055	fast	3	563.427
6	RLH117	fast	2	563.452
38	RLH121	fast	2	563.865
20	RLH112	random	1	563.932
46	RLH112	fast	1	563.978
40	RLH055	fast	3	564.087
35	RLH106	slow	1	564.124
11	RLH064	slow	2	564.231
40	RLH021	fast	3	564.449
34	RLH111	random	2	564.51
28	RLH075	fast	3	564.543
38	RLH019	fast	2	564.582
46	RLH017	fast	2	564.611
38	RLH124	fast	2	564.792
45	RLH124	fast	2	564.799
46	RLH124	fast	3	564.804
20	RLH054	fast	2	565.051
11	RLH038	random	1	565.235
5	RLH076	fast	3	565.291
12	RLH032	fast	3	565.308
16	RLH032	random	1	565.31
21	RLH106	slow	2	565.45
37	RLH070	fast	1	565.513
36	RLH030	fast	3	565.766
41	RLH020	fast	1	565.782
14	RLH121	fast	2	565.823
18	RLH034	fast	3	565.856
15	RLH055	fast	1	566.087
33	RLH048	fast	3	566.121
34	RLH044	random	2	566.309
39	RLH056	fast	2	566.352
49	RLH113	fast	1	566.542
13	RLH048	random	3	566.811
45	RLH070	fast	3	566.839
41	RLH047	fast	1	566.868
38	RLH028	fast	1	566.969
19	RLH027	fast	2	567.029
41	RLH030	fast	1	567.118
34	RLH118	random	2	567.155
23	RLH073	fast	3	567.204
29	RLH059	random	1	567.749
6	RLH039	slow	1	567.89
50	RLH032	random	2	567.974
26	RLH117	fast	2	568.139
28	RLH070	fast	3	568.181
29	RLH057	fast	3	568.358
2	RLH022	random	3	568.431
17	RLH052	random	2	568.492
17	RLH052	random	2	568.492
21	RLH074	random	1	568.544
20	RLH017	fast	2	568.6
36	RLH040	fast	2	568.649
30	RLH055	fast	1	568.751
30	RLH117	fast	2	568.835
10	RLH123	fast	3	568.84
12	RLH072	fast	1	569.107
47	RLH119	random	3	569.349
40	RLH123	fast	3	569.503
19	RLH034	fast	3	569.856
15	RLH121	fast	1	569.874
19	RLH033	fast	1	569.967
17	RLH119	slow	1	570.046
19	RLH124	fast	2	570.121
9	RLH019	fast	3	570.575
11	RLH029	slow	2	570.617
18	RLH104	fast	3	570.622
2	RLH011	random	3	570.63
33	RLH031	fast	3	570.944
45	RLH022	fast	2	571.12
46	RLH063	fast	2	571.231
26	RLH077	random	3	571.292
28	RLH111	fast	3	571.851
39	RLH063	fast	2	571.88
30	RLH120	fast	2	571.919
16	RLH033	random	1	571.993
15	RLH047	fast	1	572.201
44	RLH070	slow	1	572.209
46	RLH054	fast	3	572.384
29	RLH017	random	1	572.61
30	RLH045	fast	2	572.791
36	RLH015	fast	3	572.899
46	RLH031	fast	3	572.928
41	RLH056	fast	1	573.029
32	RLH034	slow	2	573.187
19	RLH063	fast	1	573.2
46	RLH104	fast	3	573.294
39	RLH033	fast	2	573.301
34	RLH108	random	1	573.431
38	RLH030	random	3	573.767
18	RLH030	fast	3	573.771
45	RLH034	fast	1	573.851
2	RLH075	slow	2	573.868
17	RLH112	slow	1	573.976
19	RLH119	fast	3	574.05
9	RLH031	slow	2	574.285
45	RLH059	fast	1	574.402
17	RLH126	random	2	574.482
38	RLH073	fast	1	574.54
29	RLH038	fast	3	574.565
4	RLH039	random	2	574.569
48	RLH010	random	1	574.64
35	RLH079	slow	1	574.683
30	RLH015	fast	2	574.901
38	RLH063	fast	1	575.192
35	RLH035	random	2	575.433
10	RLH031	fast	3	575.618
49	RLH044	fast	1	575.639
29	RLH076	fast	2	575.929
25	RLH105	slow	2	575.982
12	RLH031	fast	3	576.272
15	RLH071	fast	1	576.409
7	RLH059	random	2	576.418
1	RLH121	fast	3	576.537
27	RLH125	slow	1	576.543
30	RLH029	fast	1	576.613
45	RLH040	fast	2	576.64
18	RLH106	slow	2	576.781
46	RLH057	fast	2	577.048
11	RLH052	slow	3	577.135
11	RLH052	slow	3	577.135
33	RLH075	fast	3	577.207
21	RLH105	random	1	577.315
7	RLH106	random	2	577.449
45	RLH123	fast	1	577.505
38	RLH061	random	3	577.591
18	RLH031	fast	3	577.612
25	RLH021	fast	1	577.731
46	RLH071	fast	2	577.751
30	RLH059	random	3	577.753
19	RLH021	fast	2	577.774
29	RLH026	fast	3	577.793
30	RLH104	fast	2	577.955
34	RLH124	random	1	578.144
33	RLH044	fast	3	578.313
28	RLH022	fast	3	578.43
19	RLH076	fast	3	578.625
9	RLH044	fast	3	578.993
21	RLH037	slow	3	579.106
10	RLH076	fast	3	579.29
42	RLH077	fast	3	579.293
34	RLH035	random	2	579.434
5	RLH123	fast	3	579.492
45	RLH070	fast	2	579.509
28	RLH044	random	2	579.65
28	RLH059	random	2	579.756
17	RLH041	random	2	579.788
14	RLH022	fast	2	579.799
44	RLH118	random	2	579.807
45	RLH104	fast	2	579.953
50	RLH103	slow	1	580.092
38	RLH107	fast	2	580.099
14	RLH063	fast	2	580.49
26	RLH029	fast	2	580.61
16	RLH124	random	2	580.798
5	RLH044	fast	2	580.986
40	RLH118	random	1	581.151
45	RLH033	fast	3	581.298
48	RLH124	random	1	581.468
33	RLH027	fast	3	581.693
23	RLH059	random	1	581.762
37	RLH052	fast	1	581.774
37	RLH052	fast	1	581.774
7	RLH118	slow	1	581.819
41	RLH111	slow	3	581.826
40	RLH120	random	2	581.899
39	RLH010	slow	1	581.966
29	RLH030	fast	3	582.433
15	RLH043	fast	1	582.745
22	RLH035	random	2	582.801
10	RLH125	fast	3	583.211
46	RLH120	fast	3	583.249
9	RLH076	fast	3	583.291
36	RLH010	slow	1	583.306
45	RLH040	fast	3	583.306
20	RLH117	fast	2	583.497
7	RLH070	slow	1	583.509
46	RLH031	fast	2	583.61
39	RLH027	fast	2	583.69
4	RLH072	random	1	583.763
40	RLH074	fast	3	583.887
28	RLH017	fast	3	583.907
33	RLH032	fast	3	583.972
17	RLH108	random	2	584.094
13	RLH044	random	2	584.296
31	RLH059	random	2	584.414
3	RLH072	slow	2	584.429
47	RLH041	random	1	584.44
26	RLH063	fast	2	584.541
35	RLH120	random	2	584.588
36	RLH077	fast	3	584.606
46	RLH077	fast	1	584.626
1	RLH112	slow	1	584.63
19	RLH070	fast	2	584.823
46	RLH014	fast	3	584.99
49	RLH113	fast	2	585.221
13	RLH017	random	2	585.262
6	RLH079	fast	2	585.363
40	RLH108	fast	3	585.429
31	RLH126	slow	1	585.805
46	RLH112	fast	2	585.925
17	RLH112	random	2	585.945
8	RLH112	random	3	585.971
33	RLH040	fast	3	585.981
36	RLH055	fast	3	586.092
36	RLH015	fast	2	586.233
25	RLH054	fast	1	586.353
19	RLH030	fast	3	586.441
49	RLH121	fast	1	586.531
29	RLH039	random	1	586.564
23	RLH077	random	1	586.626
37	RLH119	fast	1	586.705
30	RLH071	fast	2	587.082
29	RLH052	random	1	587.129
29	RLH052	random	1	587.129
8	RLH063	random	1	587.209
38	RLH121	fast	1	587.225
26	RLH119	fast	2	587.388
27	RLH035	slow	1	587.421
42	RLH031	fast	3	587.606
19	RLH057	fast	3	587.719
29	RLH054	fast	3	587.727
35	RLH060	slow	3	587.756
36	RLH022	fast	3	587.798
1	RLH111	fast	3	587.848
38	RLH075	fast	2	587.882
7	RLH039	slow	1	588.563
25	RLH009	fast	1	588.588
8	RLH040	random	3	588.655
37	RLH119	fast	3	588.682
16	RLH014	random	2	588.982
29	RLH019	fast	2	589.246
42	RLH105	fast	3	589.3
50	RLH070	slow	1	589.515
29	RLH020	fast	2	589.78
30	RLH020	fast	1	589.781
14	RLH034	slow	1	589.828
36	RLH075	fast	3	589.876
47	RLH125	random	1	589.883
49	RLH009	fast	1	589.907
29	RLH071	fast	2	590.403
34	RLH111	slow	3	590.499
43	RLH111	slow	3	590.506
29	RLH034	fast	3	590.512
29	RLH081	random	1	590.554
47	RLH112	slow	2	590.637
25	RLH119	slow	2	590.672
44	RLH016	random	2	590.679
39	RLH015	fast	2	590.892
10	RLH027	fast	2	591.028
18	RLH057	fast	3	591.045
13	RLH071	fast	1	591.074
38	RLH059	fast	2	591.086
36	RLH113	fast	3	591.191
28	RLH074	random	1	591.208
40	RLH024	random	1	591.313
25	RLH106	fast	1	591.459
40	RLH015	fast	3	591.563
10	RLH020	fast	2	591.776
40	RLH073	fast	3	591.855
26	RLH019	fast	2	591.867
5	RLH040	fast	3	591.962
29	RLH043	fast	2	592.067
33	RLH015	fast	3	592.225
42	RLH015	fast	3	592.225
15	RLH031	fast	2	592.275
38	RLH057	random	3	592.38
12	RLH074	fast	3	592.52
45	RLH113	fast	2	592.533
8	RLH081	random	2	592.537
15	RLH124	fast	2	592.794
8	RLH026	random	1	593.127
33	RLH121	fast	3	593.195
30	RLH121	fast	1	593.206
15	RLH112	fast	2	593.309
46	RLH033	fast	1	593.318
40	RLH040	fast	3	593.321
19	RLH032	fast	3	593.975
5	RLH016	fast	3	594.004
23	RLH055	fast	3	594.091
38	RLH123	fast	2	594.157
38	RLH025	random	3	594.185
1	RLH015	slow	1	594.244
10	RLH021	fast	3	594.455
17	RLH041	slow	1	594.488
8	RLH125	random	2	594.543
19	RLH124	fast	1	594.802
40	RLH025	fast	3	594.843
6	RLH054	fast	2	595.055
37	RLH073	fast	3	595.207
42	RLH112	random	1	595.307
45	RLH016	fast	2	595.344
42	RLH119	fast	3	595.379
23	RLH107	fast	3	595.431
47	RLH023	random	3	595.573
49	RLH030	fast	1	595.776
49	RLH032	fast	2	595.963
47	RLH107	random	3	596.099
6	RLH115	slow	1	596.259
24	RLH020	fast	1	596.423
45	RLH020	fast	2	596.445
10	RLH121	random	1	596.551
34	RLH120	random	2	596.579
45	RLH076	fast	2	596.627
37	RLH040	fast	1	596.646
49	RLH016	fast	2	596.677
46	RLH123	fast	2	596.818
28	RLH031	fast	3	596.937
28	RLH044	fast	3	596.969
20	RLH009	fast	2	597.248
7	RLH029	slow	1	597.281
18	RLH051	slow	2	597.419
15	RLH123	fast	2	597.497
13	RLH070	random	2	597.517
14	RLH057	fast	2	597.709
16	RLH111	random	2	597.821
21	RLH073	random	1	597.868
5	RLH033	fast	3	597.975
31	RLH016	random	2	597.985
1	RLH040	fast	3	597.986
17	RLH043	slow	1	598.088
12	RLH015	fast	3	598.26
29	RLH022	fast	3	598.461
38	RLH033	fast	1	598.616
11	RLH112	slow	3	598.641
19	RLH123	fast	3	598.82
29	RLH034	fast	2	599.196
24	RLH125	slow	2	599.209
24	RLH029	fast	1	599.252
33	RLH070	fast	3	599.507
15	RLH118	fast	1	599.82
33	RLH046	fast	3	599.85
6	RLH039	fast	2	599.913
45	RLH123	fast	3	600.155
6	RLH050	slow	3	600.187
19	RLH064	fast	2	600.219
30	RLH064	fast	1	600.226
46	RLH030	fast	3	600.439
45	RLH021	fast	2	600.443
41	RLH121	fast	1	600.533
1	RLH038	random	2	600.564
26	RLH124	fast	2	600.782
7	RLH036	random	2	600.807
42	RLH070	fast	3	600.847
14	RLH027	fast	2	601.024
12	RLH021	fast	1	601.115
39	RLH026	fast	2	601.126
8	RLH081	random	3	601.208
11	RLH012	slow	2	601.213
18	RLH075	fast	3	601.217
19	RLH075	fast	2	601.222
5	RLH038	fast	1	601.231
3	RLH010	random	3	601.305
28	RLH024	random	1	601.322
30	RLH016	fast	2	601.345
50	RLH108	random	2	601.431
14	RLH070	fast	2	601.506
32	RLH121	fast	1	601.849
49	RLH032	fast	1	601.964
28	RLH033	fast	3	601.979
12	RLH045	fast	3	602.094
37	RLH115	fast	3	602.289
5	RLH028	fast	2	602.31
39	RLH052	fast	2	602.46
39	RLH052	fast	2	602.46
15	RLH063	fast	1	602.537
10	RLH041	fast	3	603.154
37	RLH015	fast	1	603.566
35	RLH061	slow	3	603.595
14	RLH031	fast	2	603.607
5	RLH057	fast	3	603.703
19	RLH033	fast	2	603.989
11	RLH055	random	1	604.091
9	RLH045	fast	3	604.126
5	RLH124	fast	2	604.135
30	RLH064	fast	2	604.221
23	RLH020	fast	3	604.45
14	RLH113	fast	2	604.534
8	RLH077	random	3	604.622
5	RLH041	fast	2	605.104
13	RLH020	fast	1	605.109
38	RLH027	fast	1	605.663
47	RLH014	random	3	605.668
9	RLH071	slow	1	605.747
11	RLH071	random	1	605.77
40	RLH020	fast	3	605.788
20	RLH046	fast	2	605.81
3	RLH046	random	3	605.849
25	RLH063	fast	1	605.876
19	RLH123	fast	2	606.118
28	RLH015	random	2	606.224
20	RLH031	fast	2	606.272
3	RLH072	random	3	606.422
33	RLH021	fast	3	606.446
40	RLH126	random	2	606.479
32	RLH112	fast	1	606.637
31	RLH112	random	2	606.647
11	RLH043	slow	3	606.739
45	RLH045	fast	2	606.781
40	RLH030	fast	3	607.106
10	RLH074	fast	3	607.209
1	RLH077	fast	3	607.303
30	RLH123	fast	1	607.494
43	RLH070	slow	1	607.506
47	RLH028	slow	2	607.647
41	RLH071	fast	1	607.746
46	RLH059	fast	3	607.763
10	RLH072	fast	2	607.768
19	RLH021	fast	1	607.781
23	RLH022	random	1	607.784
32	RLH022	fast	1	607.788
30	RLH022	fast	2	607.793
49	RLH034	fast	2	607.852
36	RLH073	fast	2	607.873
19	RLH019	fast	2	607.912
46	RLH011	fast	3	607.964
15	RLH104	fast	2	607.97
49	RLH051	fast	2	608.073
27	RLH106	slow	1	608.082
46	RLH074	fast	2	608.544
45	RLH040	fast	1	608.638
45	RLH016	fast	3	608.667
37	RLH070	fast	3	608.855
5	RLH115	fast	2	608.933
45	RLH031	fast	3	608.954
4	RLH044	random	2	608.986
28	RLH020	fast	3	609.083
27	RLH020	slow	1	609.107
9	RLH073	fast	3	609.211
37	RLH120	slow	2	609.253
23	RLH032	random	2	609.307
47	RLH040	slow	2	609.307
30	RLH048	random	3	609.447
19	RLH070	fast	3	609.506
49	RLH015	fast	2	609.556
5	RLH015	fast	2	609.571
12	RLH054	fast	3	609.745
45	RLH060	fast	2	609.749
18	RLH111	fast	3	609.839
45	RLH075	fast	2	609.856
15	RLH121	fast	2	609.863
5	RLH121	fast	3	609.864
42	RLH063	fast	3	609.867
18	RLH016	fast	3	610.011
16	RLH043	random	1	610.076
38	RLH056	fast	2	610.36
27	RLH110	random	3	610.38
1	RLH020	fast	3	610.426
11	RLH072	slow	3	610.426
19	RLH020	fast	3	610.442
29	RLH022	random	1	610.46
28	RLH034	fast	3	610.523
29	RLH081	fast	3	610.555
32	RLH017	fast	1	610.609
3	RLH055	random	3	610.756
46	RLH070	fast	3	610.84
4	RLH061	random	2	610.921
26	RLH044	fast	2	610.983
12	RLH052	slow	2	611.127
12	RLH052	slow	2	611.127
8	RLH118	random	2	611.133
47	RLH118	random	1	611.145
40	RLH104	fast	3	611.303
4	RLH108	random	1	611.438
38	RLH070	fast	2	611.481
3	RLH037	random	3	611.777
1	RLH126	random	2	611.835
31	RLH011	random	2	611.968
41	RLH033	fast	1	611.975
42	RLH055	fast	3	612.063
6	RLH106	slow	3	612.122
30	RLH028	fast	2	612.304
32	RLH056	fast	1	612.351
20	RLH126	fast	2	612.471
21	RLH121	random	1	612.531
37	RLH113	fast	1	612.543
18	RLH112	fast	3	612.633
4	RLH112	random	1	612.65
43	RLH033	slow	1	612.657
29	RLH107	fast	3	612.772
36	RLH070	fast	3	612.839
23	RLH042	random	1	612.927
14	RLH044	fast	2	613.012
39	RLH126	slow	1	613.136
48	RLH113	slow	2	613.194
39	RLH054	fast	2	613.715
15	RLH059	fast	1	613.751
36	RLH020	fast	2	613.782
48	RLH022	random	1	613.791
15	RLH126	fast	2	613.809
45	RLH046	fast	2	613.846
26	RLH113	slow	1	613.858
37	RLH081	fast	3	613.884
27	RLH038	random	3	613.899
38	RLH120	fast	2	613.918
28	RLH016	fast	3	614.01
22	RLH070	random	2	614.18
9	RLH059	fast	3	614.424
37	RLH071	fast	1	614.424
7	RLH041	random	2	614.444
22	RLH126	slow	3	614.481
8	RLH125	random	1	614.518
18	RLH121	slow	2	614.529
1	RLH010	random	2	614.641
[truncated: 11,746 more rows]
